# Supplementary material
Source: MDPI journal article supplement (https://www.mdpi.com/2073-4395/6/1/1)
Supplement: s1 [file s1]

## Supplementary Materials

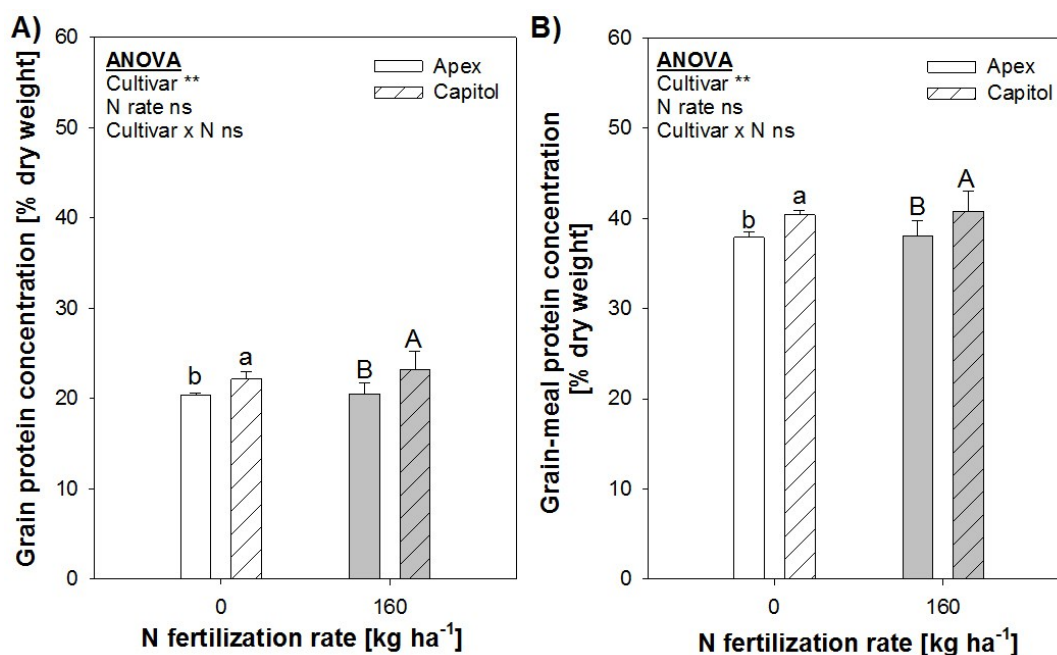

**Figure S1.** (A) Grain protein and (B) grain-meal protein concentration at maturity of the winter oilseed-rape line-cultivars Apex and Capitol as affected by the N fertilization rate (N0, N160). Different lower case and upper case letters on the top of the columns indicate differences between the cultivars within the N fertilizer rates at  $p < 0.05$ . ANOVA:

\*\* indicate significant differences at  $p < 0.10$ ,  $p < 0.01$ , respectively. ns = non-significant. The error bars represent the standard deviations of the means ( $n = 3-4$ ).

**Table S1.** *F*-test for the amount of N remaining in the crop residues at maturity of the winter oilseed-rape line-cultivars Apex and Capitol as affected by cultivar, N fertilization rate (N0, N160), individual plant part (taproot, stem, intact leaves, shed leaves and pod-wall) and their interactions ( $n = 3-4$ ).

| N Remaining in Crop Residues<br>(kg ha <sup>-1</sup> ) |     |
|--------------------------------------------------------|-----|
| Cultivar                                               | ns  |
| N rate                                                 | *** |
| Plant part                                             | **  |
| Cultivar × N                                           | ns  |
| Cultivar × Plant part                                  | ns  |
| N × Plant part                                         | ns  |
| Cultivar × N × Plant part                              | ns  |
